# Supplementary figures and images for: Transitions into and out of daylight saving time compromise sleep and the rest-activity cycles
Source: Springer Nature journal article supplement (doi:10.1186/1472-6793-8-3), 2008-02-12

# Fall

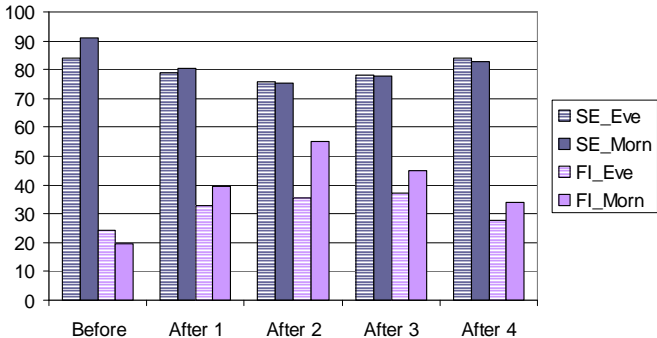

Supplement: 12899_2007_103_MOESM1_ESM.pdf [file 12899_2007_103_MOESM1_ESM.pdf]

# Spring

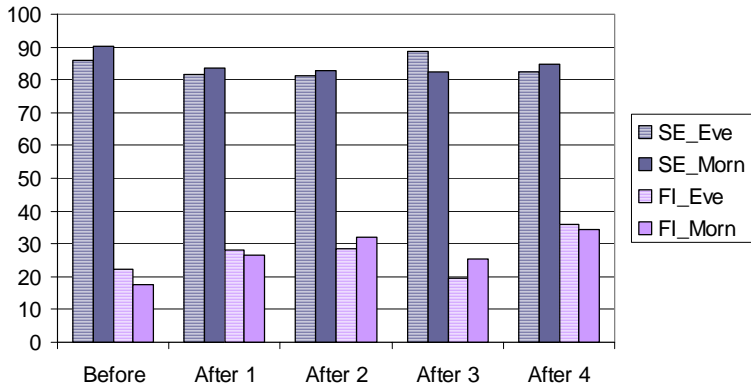

Supplement: 12899_2007_103_MOESM2_ESM.pdf [file 12899_2007_103_MOESM2_ESM.pdf]

# Fall

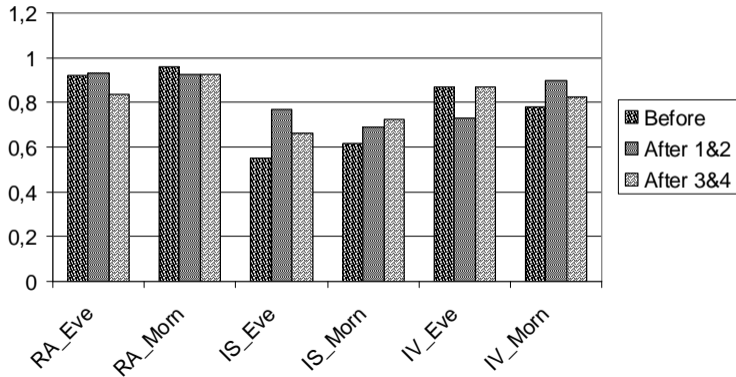

Supplement: 12899_2007_103_MOESM3_ESM.pdf [file 12899_2007_103_MOESM3_ESM.pdf]

# Spring

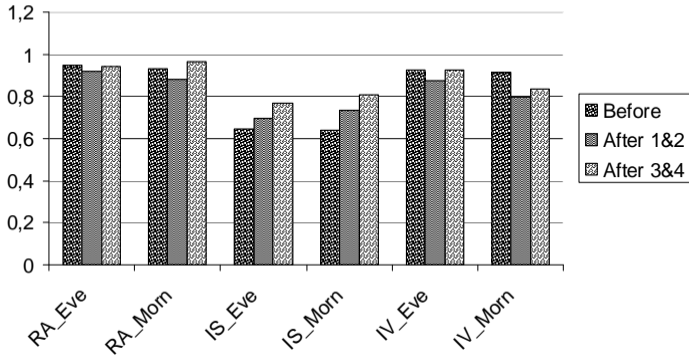

Supplement: 12899_2007_103_MOESM4_ESM.pdf [file 12899_2007_103_MOESM4_ESM.pdf]

## Fall

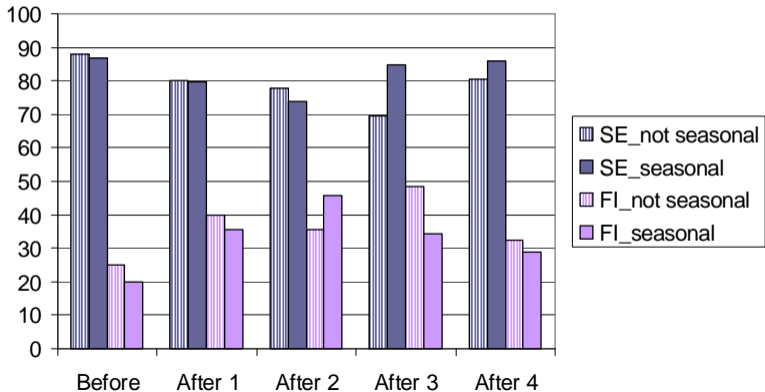

Supplement: 12899_2007_103_MOESM5_ESM.pdf [file 12899_2007_103_MOESM5_ESM.pdf]

## Spring

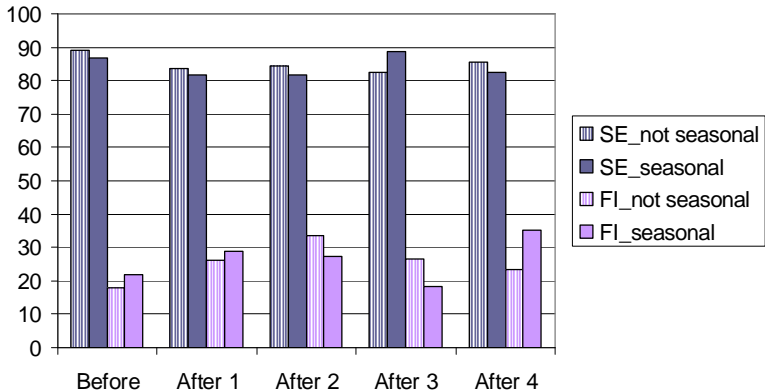

Supplement: 12899_2007_103_MOESM6_ESM.pdf [file 12899_2007_103_MOESM6_ESM.pdf]

## Fall

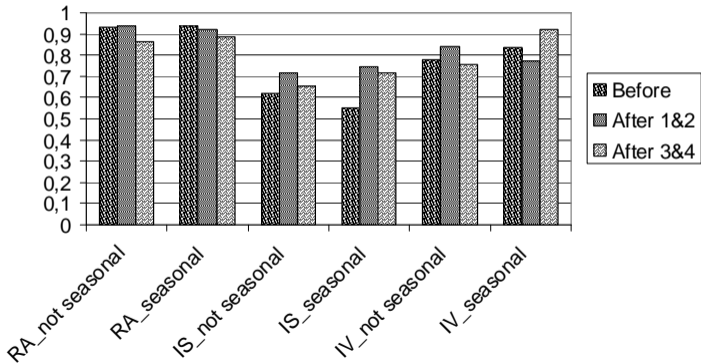

Supplement: 12899_2007_103_MOESM7_ESM.pdf [file 12899_2007_103_MOESM7_ESM.pdf]

## Spring

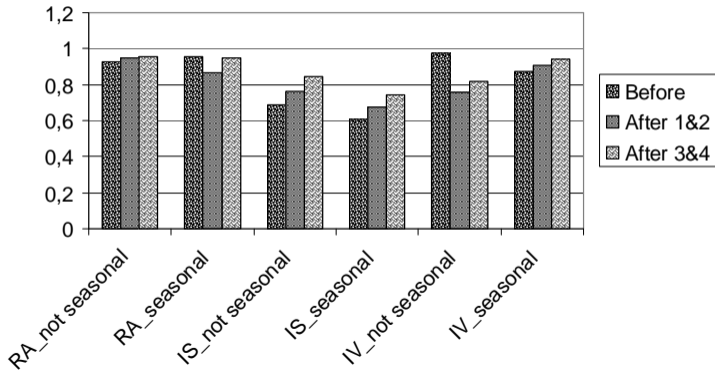

Supplement: 12899_2007_103_MOESM8_ESM.pdf [file 12899_2007_103_MOESM8_ESM.pdf]
